# Supplementary material for: Protocol for a multicenter study on (cost)effectiveness of the Back At work After Surgery (BAAS): a clinical pathway for knee arthroplasty
Source: Research Square preprint supplement (doi:10.21203/rs.3.rs-2370567/v1), 2022-12-27
Supplement: Supplementary file 1 [file d21d8429693fad2c1c1df805.docx]

Table 1: Measurements on different time points

|  | **STUDY PERIOD** | | | | | | |
| --- | --- | --- | --- | --- | --- | --- | --- |
| **TIME POINT** | ***t0*** |  | ***t1*** | ***t2*** | ***t3*** | ***t4*** | ***t5*** |
|  | ***Preoperative***  ***± 2-4 weeks***  ***before surgery*** | ***Surgery*** |  |  |  |  |  |
| **Primary outcomes** |  |  |  |  |  |  |  |
| *First day of return to work** |  |  | X | X | X | X | X |
| *First day of full return to work** |  |  | X | X | X | X | X |
| *Costs* |  |  |  | X | X | X | X |
|  |  |  |  |  |  |  |  |
| **Secondary Outcomes** |  |  |  |  |  |  |  |
| ***Work*** |  |  |  |  |  |  |  |
| *Number of sick leave periods* |  |  |  | X | X | X | X |
|  |  |  |  |  |  |  |  |
| ***Patient reported outcomes*** |  |  |  |  |  |  |  |
| *WORQ** | X |  | X | X | X | X | X |
| *CSI** | X |  | X | X | X | X | X |
| *KOOS** | X |  | X | X | X | X | X |
| *Work Ability Score* | X |  |  | X | X | X | X |
|  |  |  |  |  |  |  |  |
| ***Performance-based functioning*** |  |  |  |  |  |  |  |
| *DEMMI** | X |  | X | X | X | X | X |
| *6 MWT** | X |  | X | X | X | X | X |
| *30-STST** | X |  | X | X | X | X | X |
| *FTST ** | X |  | X | X | X | X | X |
| *Floor-to-waist lifting test** | X |  |  | X | X | X | X |
|  |  |  |  |  |  |  |  |
| **Patient characteristics** | X |  |  |  |  |  |  |
|  |  |  |  |  |  |  |  |
| **Process** |  |  |  |  |  |  |  |
| *Compiling report of beneficial and limiting factors for return to work* | X |  |  |  |  |  |  |
| *Interdisciplinary consultation* |  |  | X |  |  |  |  |
| *Wearing accelerometer** |  |  |  |  |  |  |  |
|  |  |  |  |  |  |  |  |
| T0 = baseline; T1 = 6 weeks after surgery; T2 = 3 months after surgery; T3 = 6 months after surgery; T4 = 9 months after surgery; T5 = 12 months after surgery.  Abbreviations: CSI = central sensitization inventory, DEMMI = de Morton mobility index, FTST = five time sit to stand test, iPCQ = , KOOS = knee osteoarthritis outcome score, WORQ = Work, Osteoarthritis and joint-replacement questionnaire, 6 MWT = 6-minute walk test, 30-STST = 30 seconds sit to stand test.  * = follow-up measurements stop after full return to work. | | | | | | | |
